# Supplementary material
Source: PubMed Central journal article supplement (PMC4459759)
Supplement: NIHMS694806-supplement-2.pdf [file NIHMS694806-supplement-2.pdf]

Copyright WILEY-VCH Verlag GmbH & Co. KGaA, 69469 Weinheim, Germany,  
2014.

## Supporting Information

for *Adv. Funct. Mater.*, DOI: 10.1002/adfm.((please add manuscript number))

### Title: Injectable Peptide Decorated Functional Nanofibrous Hollow Microspheres to Direct Stem Cell Differentiation for Tissue Regeneration

Zhanpeng Zhang, Melanie J. Gupte, Xiaobing Jin and Peter X. Ma\*

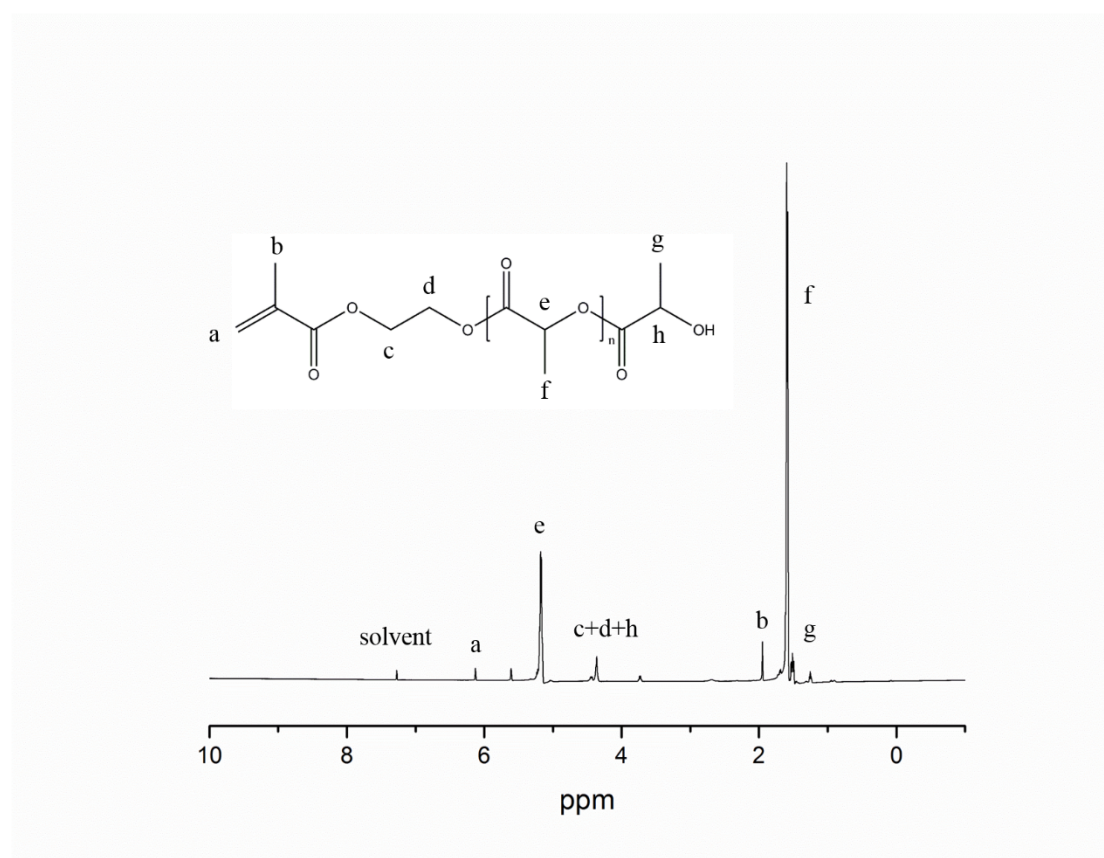

**Figure S1.** NMR spectrum of macromonomer HEMA-PLLA5. <sup>1</sup>H NMR (400 MHz, CDCl<sub>3</sub>, δ): 6.10 (s, 2H, a), 5.17 (q, J = 8 Hz, 1H; e), 4.25 (m, 5H; c+d+h), 2.01 (s, 3H, b), 1.38 (d, J = 8Hz, 3H; f), 1.35 (d, J = 8Hz, 3H; g).

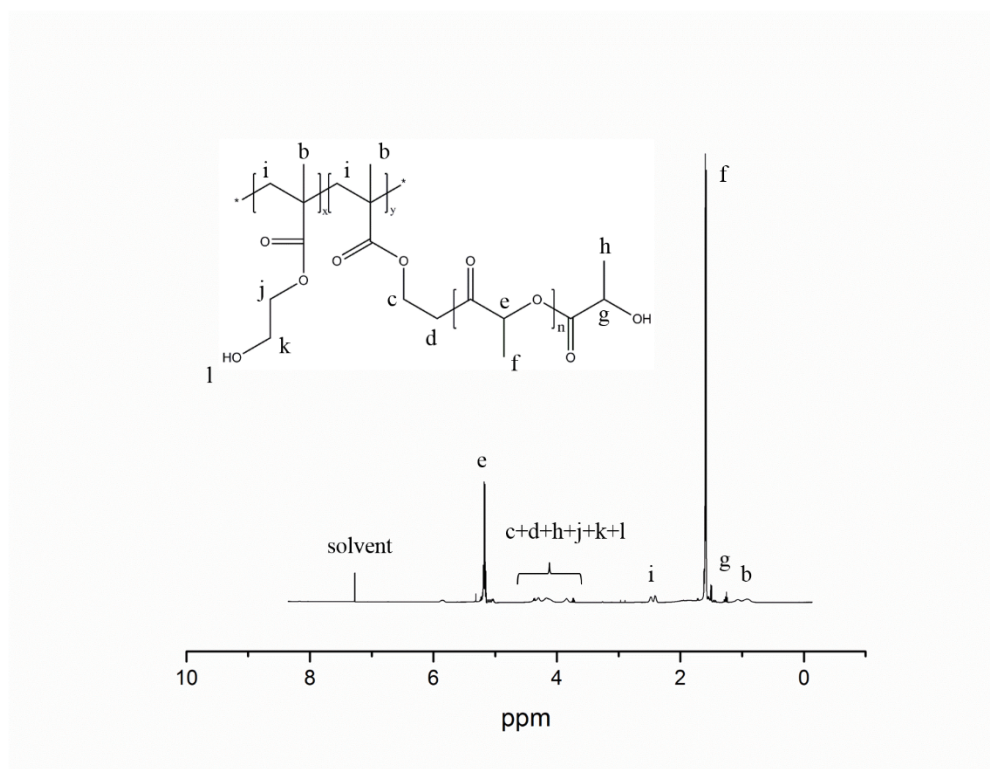

**Figure S2.** NMR spectrum of graft copolymer PHEMA10-g-PLLA5.  $^1\text{H}$  NMR (400 MHz,  $\text{CDCl}_3$ ,  $\delta$ ): 5.17 (q,  $J = 8$  Hz, 1H; e), 4.30 (m, 10H; c+d+h+j+k+l), 2.41 (s, 2H, i), 1.58 (d,  $J = 8$ Hz, 3H; f), 1.35 (d,  $J = 8$ Hz, 3H; g), 1.01 (s, 3H, b).

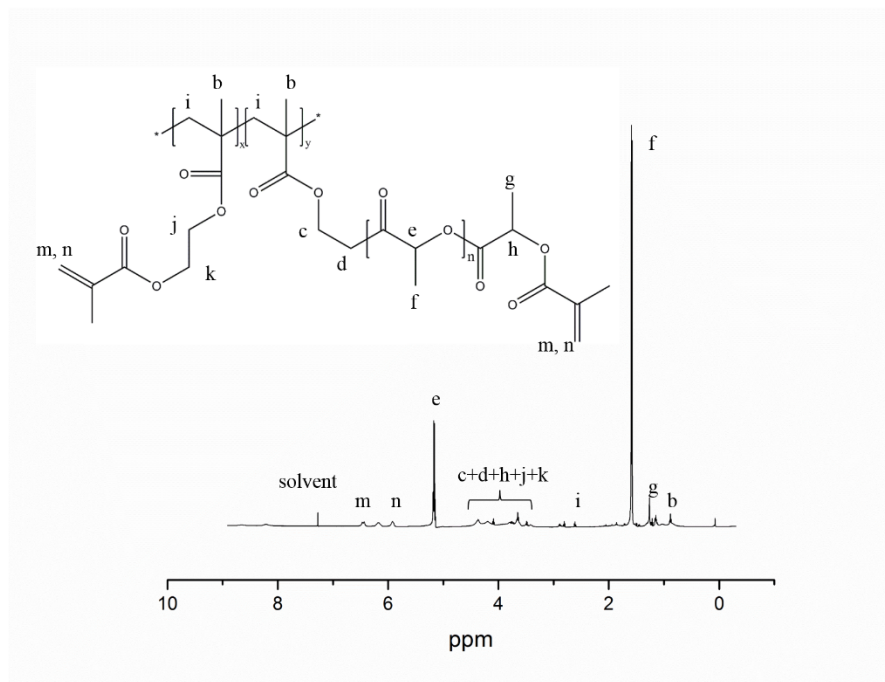

**Figure S3.** NMR spectrum of functionalized graft copolymer PHEMA-g-PLLA-alkene.  $^1\text{H}$  NMR (400 MHz,  $\text{CDCl}_3$ ,  $\delta$ ): 6.11 (m, 3H, m+n), 5.17 (q,  $J = 8$  Hz, 1H; e), 4.10 (m, 9H; c+d+h+j+k), 2.62 (s, 2H, i), 1.65 (d,  $J = 8$ Hz, 3H; f), 1.30 (d,  $J = 8$ Hz, 3H; g), 0.98 (s, 3H, b).

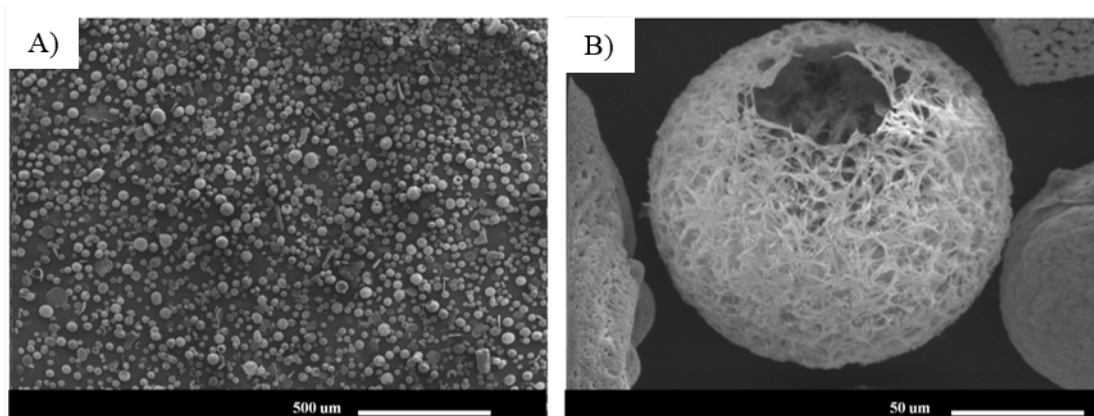

**Figure S4.** SEM of FNF-HMS after click reaction with GF-mimicking peptide CM10.

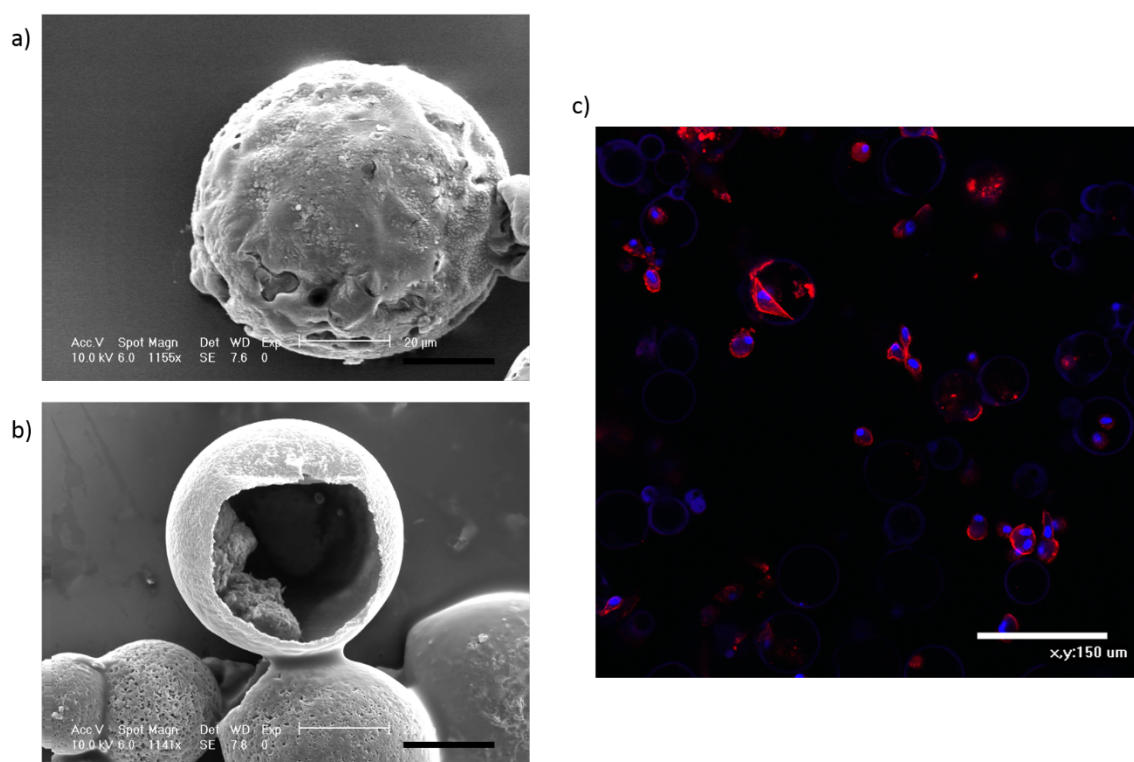

**Figure S5.** a, b) SEM graphs of BMSCs seeded on FNF-HMS for 1 day. BMSCs attached to both the outside (a) and inside (b) of the microspheres. Scale bar: 20 μm. c) Confocal images of BMSCs seeded on FNF-HMS for 1 week, showing that many cells were able to adhere to the inside of the microspheres. Blue: nuclei; red: F-actin.
